# Supplementary material for: Applying Compressed Sensing Volumetric Interpolated Breath-Hold Examination and Spiral Ultrashort Echo Time Sequences for Lung Nodule Detection in MRI
Source: MDPI journal article supplement (doi:10.3390/diagnostics12010093), 2021-12-31
Supplement: s1 [file s1]

**Table S1. Qualitative grading system for assessment of lung MR images obtained using conventional VIBE, spiral UTE, and CS VIBE sequences**

| Score                            | 1                                                      | 2                                                                               | 3                                           | 4                                                             | 5                                                                             |
|----------------------------------|--------------------------------------------------------|---------------------------------------------------------------------------------|---------------------------------------------|---------------------------------------------------------------|-------------------------------------------------------------------------------|
| Pulmonary vascular depiction     | Unacceptable (invisible peripheral pulmonary vessels)  | Poor (barely visible peripheral pulmonary vessels)                              | Fair (visible peripheral pulmonary vessels) | Good (visible peripheral pulmonary vessels with clear margin) | Excellent (visible peripheral pulmonary vessels to the distal lung periphery) |
| Airway depiction                 | Unacceptable (indistinguishable lobar bronchial walls) | Poor (visible lobar bronchial walls with few visible segmental bronchial walls) | Fair (visible segmental bronchial walls)    | Good (visible subsegmental bronchial walls)                   | Excellent (visible sub-subsegmental bronchial walls)                          |
| Cardiac motion artifact          | Unacceptable artifacts                                 | Moderate artifacts                                                              | Acceptable artifacts                        | Slight artifacts                                              | No artifact                                                                   |
| Image noise for nodule detection | Unacceptable noise affecting nodule detection          | Moderate noise                                                                  | Acceptable noise                            | Slight noise                                                  | Minimal or no noise                                                           |
| Overall image quality            | Non-diagnostic                                         | Poor                                                                            | Acceptable                                  | Good                                                          | Excellent                                                                     |

Abbreviations: MR: magnetic resonance; VIBE: volumetric interpolated breath-hold examination; UTE: ultrashort echo time; CS: compressed sensing.
